# Supplementary material for: Aromatic hydroxylation using an oxo-bridged diiron(iii) complex: a bio-inspired functional model of toluene monooxygenases
Source: Royal Society of Chemistry journal article supplement (doi:10.1039/c5dt01773d), 2015-01-01
Supplement: c5dt01773d1.pdf [file c5dt01773d1.pdf]

## Electronic Supporting Information

### Aromatic Hydroxylation by an Oxo-bridged Diiron(III) Complex: A Bio-inspired Functional Model of *Toluene Monooxygenases*

Ambica Kejriwal,<sup>a</sup> and Pinaki Bandyopadhyay<sup>a</sup> and Achintesh N. Biswas<sup>\*b</sup>

<sup>a</sup> Department of Chemistry, University of North Bengal, Raja Rammohunpur, Siliguri 734013, India. Fax: 91 353 2699001; Tel: 91 353 277684; E-mail: [pbchem@rediffmail.com](mailto:pbchem@rediffmail.com)

<sup>b</sup> Department of Chemistry, Siliguri College, Siliguri 734001, India; E-mail: [achintesh@gmail.com](mailto:achintesh@gmail.com)

#### Contents

Figure S1a. ESIMS spectrum obtained during the course of benzene hydroxylation by **2**/H<sub>2</sub>O<sub>2</sub>.

Figure S1b. Experimental and theoretical isotope distribution patterns. The peak at  $m/z = 342$  has been assigned to  $[(\text{bpmen})\text{Fe}^{\text{III}}(\text{O})]^+$  whereas the peak at  $m/z = 361$  can be assigned to the species  $[\{(\text{bpmen})\text{Fe}^{\text{III}}(\text{O})(\text{OH}_2)\} + \text{H}]^+$ . The peak at  $m/z = 478$  can be assigned to  $[(\text{bpmen})\text{Fe}^{\text{III}}(\text{OPh})(\text{OH})(\text{MeCN}) + \text{H}]^+$ .

Figure S2. Rate of formation of phenolate as a function of benzene concentration

Figure S3. Electronic changes observed after the addition of additional H<sub>2</sub>O<sub>2</sub> (10 mM) to the final diiron(III) complex (black line). The final spectrum corresponding to the phenolate bound iron(III) species is shown in green.

Figure S4. Rate of formation of phenolate as a function of benzene concentration.

Figure S4. X-band EPR spectrum obtained after the addition of 10 mM H<sub>2</sub>O<sub>2</sub> to an acetonitrile solution of **2** (1.0 mM) at 298 K followed by rapid freezing of the solution (red line). EPR spectrum obtained after the addition of 10 mM H<sub>2</sub>O<sub>2</sub> to an acetonitrile solution of **2** (1.0 mM) and benzene (300 mM) at 298 K followed by rapid freezing of the solution (black line).

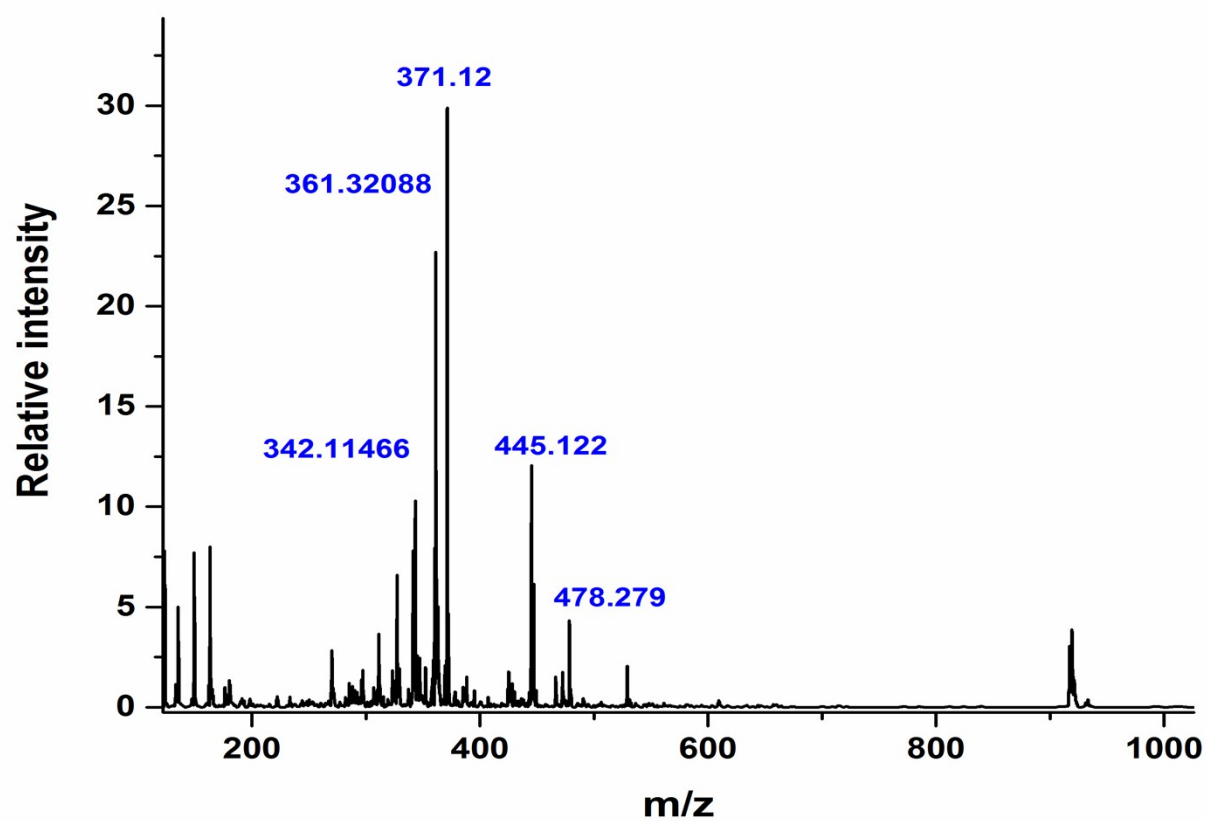

Figure S1a. ESIMS spectrum obtained during the course of benzene hydroxylation by **2**/H<sub>2</sub>O<sub>2</sub>.

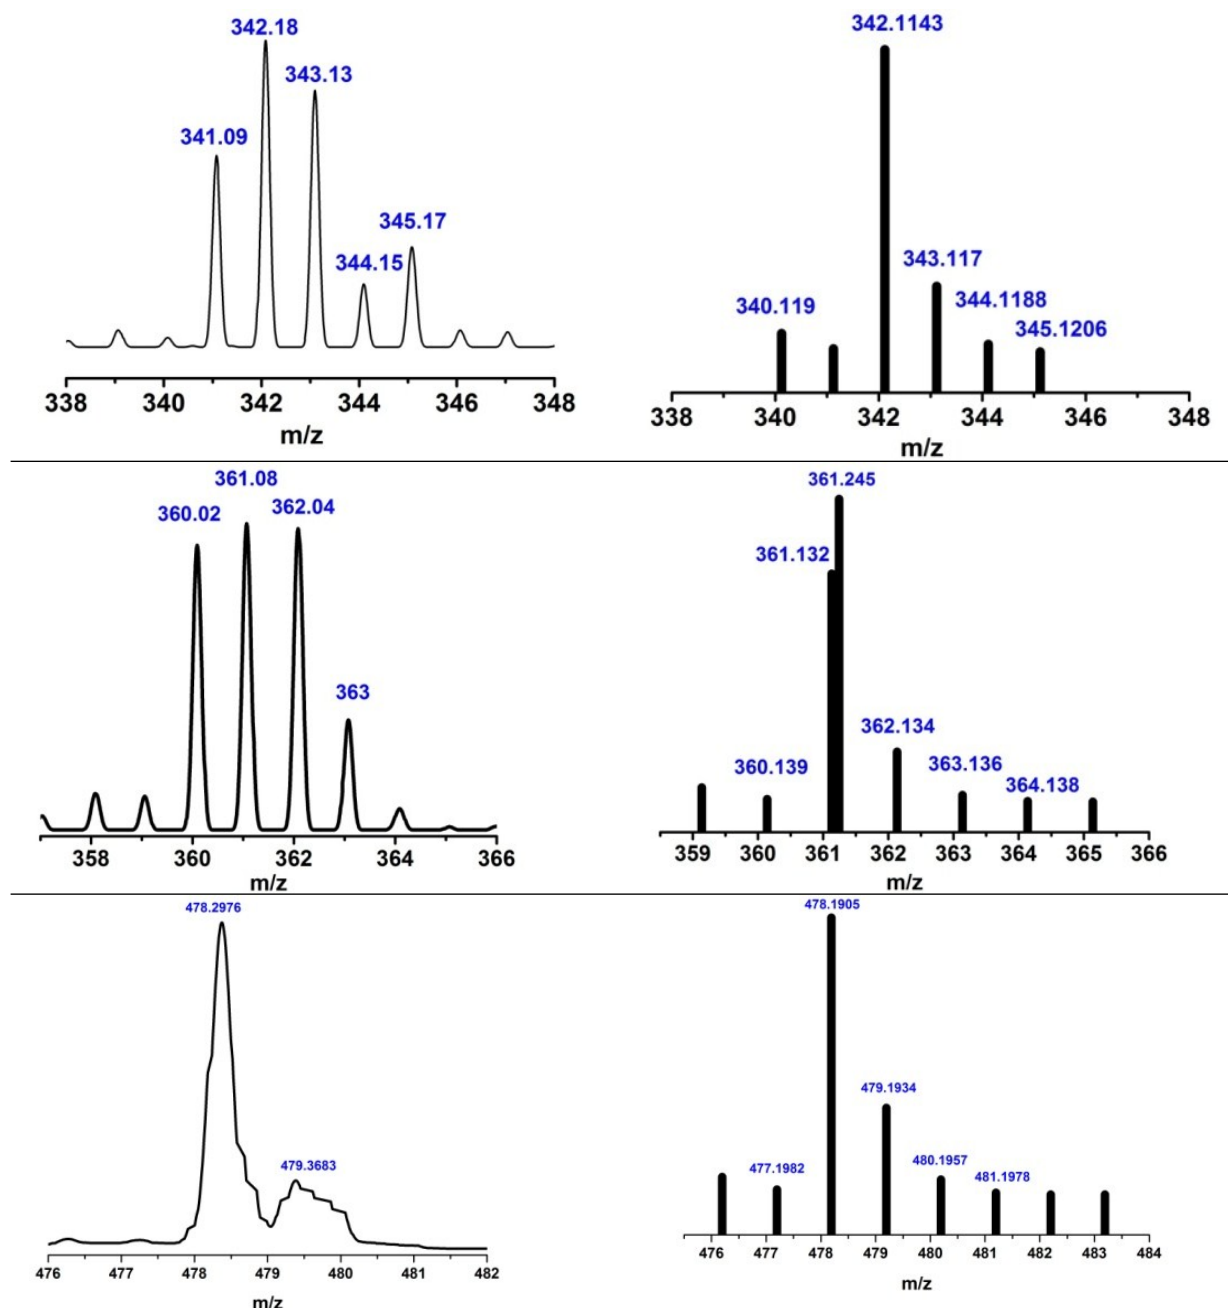

Figure S1b. Experimental and theoretical isotope distribution patterns. The peak at  $m/z = 342$  has been assigned to  $[(\text{bpmen})\text{Fe}^{\text{III}}(\text{O})]^+$  whereas the peak at  $m/z = 361$  can be assigned to the species  $[\{(\text{bpmen})\text{Fe}^{\text{III}}(\text{O})(\text{OH}_2)\}+\text{H}]^+$ . The peak at  $m/z = 478$  can be assigned to  $[(\text{bpmen})\text{Fe}^{\text{III}}(\text{OPh})(\text{OH})(\text{MeCN})+\text{H}]^+$ .

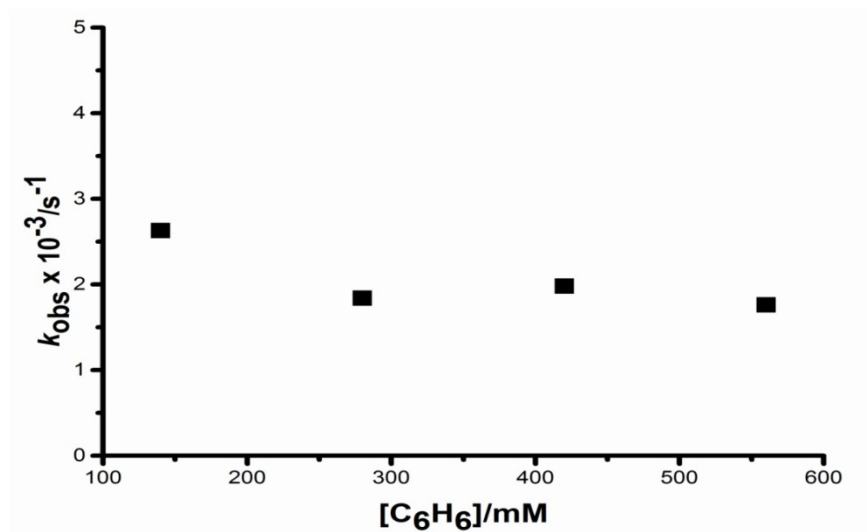

Figure S2. Rate of formation of phenolate as a function of benzene concentration.

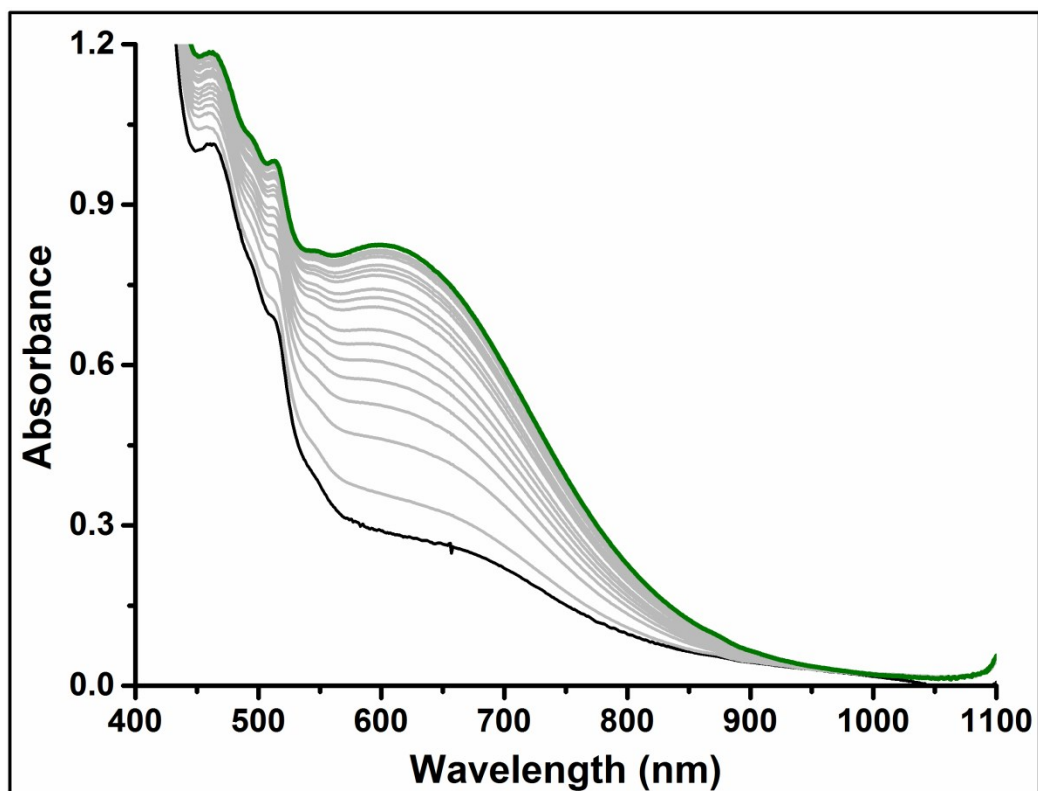

Figure S3. Electronic changes observed after the addition of additional H<sub>2</sub>O<sub>2</sub> (10 mM) to the final diiron(III) complex (black line). The final spectrum corresponding to the phenolate bound iron(III) species is shown in green.

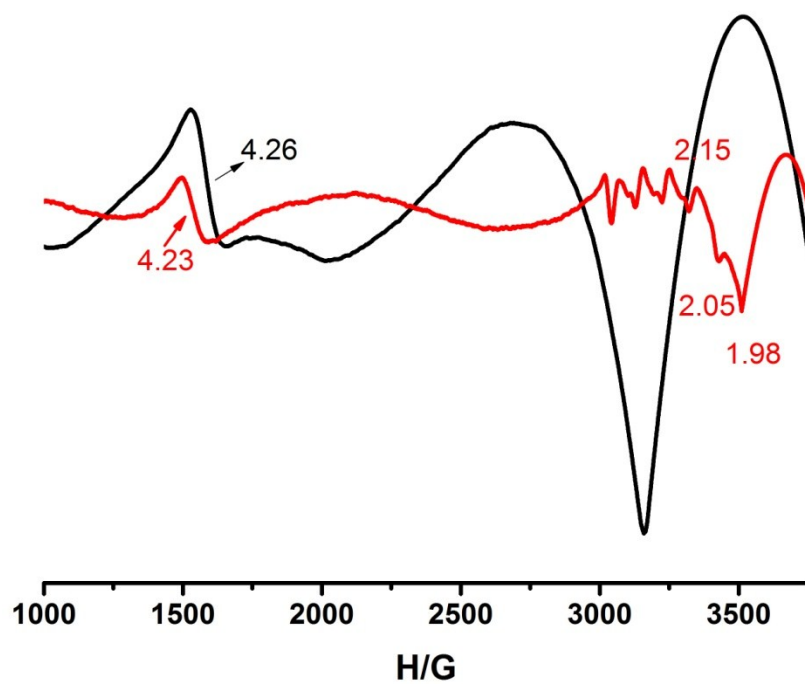

Figure S4. X-band EPR spectrum obtained after the addition of 10 mM H<sub>2</sub>O<sub>2</sub> to an acetonitrile solution of **2** (1.0 mM) at 298 K followed by rapid freezing of the solution (red line). EPR spectrum obtained after the addition of 10 mM H<sub>2</sub>O<sub>2</sub> to an acetonitrile solution of **2** (1.0 mM) and benzene (300 mM) at 298 K followed by rapid freezing of the solution (black line).
